# Supplementary material for: Effects of vegetation restoration on distribution characteristics of heavy metals in soil in Karst plateau area of Guizhou
Source: PeerJ. 2023 Mar 17;11:e15044. doi: 10.7717/peerj.15044 (PMC10026723; doi:10.7717/peerj.15044)
Supplement: Supplemental Information 1 [file peerj-11-15044-s001.xlsx]

## Sheet: Sheet1
Landform	Point	Sampling point	Depth (cm)	SOC(g/kg)	ROC(g/kg)	DOC(mg/kg)	TN(g/kg)	NO3--N(g/kg)	NH4+-N(mg/kg)	TP(g/kg)	AP(mg/kg)	pH	SWC (%)	BD (g)	EC (μs/cm)
Non-karst	MT	1—1	0—10	14.5338	1.94054	2.56624	1.99033	6.80565	28.743	3.00016	4.21846	4.36	25.7178	1.2991	30.6
Non-karst		1—1	10—20	7.46795	1.77532	1.36612	1.225	8.38536	28.2737	2.18414	15.1569	4.37	_-	_-	_-
Non-karst		1—1	20—30	4.65457	2.25977	1.66547	1.06136	4.34295	31.3838	1.78684	7.24733	4.07	_-	_-	_-
Non-karst		1—1	30—40	6.60627	1.52647	1.42871	0.591111	4.14389	32.9287	1.39944	7.78092	3.97	_-	_-	_-
Non-karst		1—1	40—50	4.19354	2.05375	2.02197	0.996956	4.06086	16.4447	1.24942	15.7062	4.38	_-	_-	_-
Non-karst		1—2	0—10	15.6552	2.36277	1.88375	2.14122	7.22301	34.1312	2.80234	4.21846	4.41	32.8985	1.3645	59.5
Non-karst		1—2	10—20	11.1415	2.06395	1.79575	1.00987	5.28269	29.9125	2.39845	5.33271	4	_-	_-	_-
Non-karst		1—2	20—30	11.77	2.21897	1.90575	0.858667	1.14743	12.7308	2.07864	14.0584	3.96	_-	_-	_-
Non-karst		1—2	30—40	6.62775	2.15064	1.331	0.8456	4.16038	10.7953	1.84784	4.79912	3.74	_-	_-	_-
Non-karst		1—2	40—50	5.25649	1.64375	2.497	0.824756	4.1753	31.4853	1.62364	3.8575	3.68	_-	_-	_-
Non-karst		1—3	0—10	19.5896	2.60347	3.39402	1.2838	6.36435	32.4391	2.63914	4.39109	4.4	16.8329	1.5541	38.2
Non-karst		1—3	10—20	10.5483	2.5178	1.52997	0.498711	2.31782	32.193	1.90389	0.907094	3.96	_-	_-	_-
Non-karst		1—3	20—30	2.17663	1.66109	1.34469	0.821333	1.25854	19.3239	1.13567	1.07972	4.25	_-	_-	_-
Non-karst		1—3	30—40	4.04629	2.17206	2.66412	0.428556	2.17746	37.2565	1.05819	8.8167	4.67	_-	_-	_-
Non-karst		1—3	40—50	5.6369	1.74982	2.55183	0.547556	1.77483	32.4061	0	1.28374	4.56	_-	_-	_-
Non-karst	MS	2—1	0—10	13.4754	2.17104	1.90495	1.80616	6.52925	14.3189	3.27052	4.83051	4.35	30.7023	1.3784	17.6
Non-karst		2—1	10—20	4.53969	1.15421	1.91855	0.855556	1.43541	16.7364	2.97873	10.9667	4.31	_-	_-	_-
Non-karst		2—1	20—30	3.96505	2.29342	1.70629	1.15562	1.76305	19.5294	2.86993	8.5656	4.6	_-	_-	_-
Non-karst		2—1	30—40	12.5847	1.88445	1.28176	1.26856	2.99607	33.8572	3.90686	14.639	4.96	_-	_-	_-
Non-karst		2—1	40—50	4.71209	1.96298	1.40966	1.29344	2.32018	22.571	0.0905045	11.108	4.9	_-	_-	_-
Non-karst		2—2	0—10	19.4058	2.13024	2.5363	1.13431	1.62996	32.2539	3.41065	5.69366	4.13	29.5485	1.4285	45.3
Non-karst		2—2	10—20	9.34353	2.04457	2.69142	1.06431	2.59658	18.7912	3.0216	9.89956	4.04	_-	_-	_-
Non-karst		2—2	20—30	5.49112	2.41173	1.84508	1.21427	1.91559	16.5944	3.13699	4.83051	4.11	_-	_-	_-
Non-karst		2—2	30—40	13.8284	1.98134	1.35796	1.28567	3.11837	21.8455	2.24843	5.99184	3.86	_-	_-	_-
Non-karst		2—2	40—50	6.15236	1.80898	1.4532	1.12544	1.93227	13.8166	0	5.5838	4	_-	_-	_-
Non-karst		2—3	0—10	21.3384	2.46578	2.02675	1.69633	14.9229	21.3838	3.0694	6.38418	4.44	22.4401	1.377	53.7
Non-karst		2—3	10—20	8.02326	2.14758	1.82875	1.69633	5.31252	15.5695	2.81718	3.27684	3.67	_-	_-	_-
Non-karst		2—3	20—30	8.02326	1.67537	2.09275	1.70956	4.99136	8.0175	2.65232	5.41117	4.42	_-	_-	_-
Non-karst		2—3	30—40	3.24344	1.83345	2.19725	1.66056	4.6172	11.2722	2.55012	6.05461	5.88	_-	_-	_-
Non-karst		2—3	40—50	5.80406	2.04457	2.376	1.16589	3.64016	17.9287	2.30284	5.14438	4.47	_-	_-	_-
Non-karst	BM	3—1	0—10	17.1353	3.19602	2.47729	1.69089	9.97958	11.5259	3.38922	4.92467	4.4	35.6243	1.3022	21.8
Non-karst		3—1	10—20	4.05913	1.7692	1.75565	0.833778	4.09482	17.5583	2.40175	5.89768	4.06	_-	_-	_-
Non-karst		3—1	20—30	1.27573	2.45864	2.14609	0.717111	2.22124	19.1464	2.04237	4.56372	4.54	_-	_-	_-
Non-karst		3—1	30—40	2.37713	1.7386	2.70886	1.00178	2.06773	14.0931	1.67145	3.32392	4.8	_-	_-	_-
Non-karst		3—1	40—50	5.45084	1.93646	1.89028	0.920889	1.81822	12.4391	2.10996	2.57062	4.56	_-	_-	_-
Non-karst		3—2	0—10	7.08368	2.37807	1.83391	1.32689	10.9207	35.7826	3.61507	6.94915	4.62	31.7063	1.2272	49.8
Non-karst		3—2	10—20	12.3539	2.29138	2.24792	1.59289	6.51374	13.8775	2.26327	9.77401	4.33	_-	_-	_-
Non-karst		3—2	20—30	12.864	1.82631	2.33684	0.637	3.20711	18.7405	1.96653	4.03013	4.07	_-	_-	_-
Non-karst		3—2	30—40	1.33173	1.33065	1.95617	0.715556	2.92285	29.6791	2.07864	3.27684	4.9	_-	_-	_-
Non-karst		3—2	40—50	4.70356	1.77022	2.22014	0.739044	4.26443	22.9515	1.86433	0.624608	4.66	_-	_-	_-
Non-karst		3—3	0—10	9.25007	1.5795	2.22956	1.68856	6.49666	19.707	2.82542	6.10169	3.89	25.2683	1.5466	36.5
Non-karst		3—3	10—20	10.1518	1.75798	2.41267	1.449	3.27071	34.0601	2.34899	3.6221	4.26	_-	_-	_-
Non-karst		3—4	20—30	4.47959	1.57746	3.01045	1.50111	3.25834	29.9404	2.37043	2.47646	4.34	_-	_-	_-
Non-karst		3—5	30—40	2.09435	2.40255	2.25649	1.58356	1.14154	31.2823	2.18744	1.20527	4.85	_-	_-	_-
Non-karst		3—6	40—50	4.47959	1.22152	2.33189	1.32611	2.67589	33.8369	2.42483	7.13748	4.39	_-	_-	_-
Non-karst	SS	4—1	0—10	20.4317	2.08868	2.50014	1.946	6.30762	27.3833	6.20986	2.74718	7.25	26.7208	1.54	66.6
Non-karst		4—1	10—20	17.8247	1.89822	2.40152	0.9135	2.52473	28.6086	7.08193	1.40537	7.01	_-	_-	_-
Non-karst		4—1	20—30	17.8853	2.17129	2.61615	0.86625	0.931095	29.9429	4.591	1.58192	7.61	_-	_-	_-
Non-karst		4—1	30—40	12.0044	2.26079	2.80178	0.9058	2.06086	24.5345	4.45912	1.33475	7.68	_-	_-	_-
Non-karst		4—1	40—50	11.1556	1.93723	1.58361	1.15325	0.919709	11.5335	4.68002	1.89972	7.7	_-	_-	_-
Non-karst		4—2	0—10	16.7833	2.169	1.81758	2.1875	9.64625	23.6492	6.80003	6.41949	6.63	24.6467	1.5	63.5
Non-karst		4—2	10—20	17.2495	2.04508	1.82364	0.9555	1.86906	25.6481	3.92005	2.14689	7.35	_-	_-	_-
Non-karst		4—2	20—30	13.9278	2.62106	2.77484	0.5775	2.39164	27.0637	4.80201	1.47599	7.49	_-	_-	_-
Non-karst		4—2	30—40	13.9861	1.47139	2.73848	0.5425	0.953867	24.187	5.01467	1.1935	7.31	_-	_-	_-
Non-karst		4—2	40—50	16.7833	2.18047	2.35679	0.52675	0.522772	30.4097	5.05753	0.734463	7.91	_-	_-	_-
Non-karst		4—3	0—10	18.4861	2.78628	1.76344	1.87425	7.67	30.7166	4.80531	2.95904	6.73	28.489	1.4897	97.6
Non-karst		4—3	10—20	15.5976	2.1254	2.46759	1.56625	4.88457	26.2722	3.84751	2.25282	7.56	_-	_-	_-
Non-karst		4—3	20—30	16.0598	2.88725	2.06347	1.2075	2.68433	26.0819	3.36119	2.42938	8.06	_-	_-	_-
Non-karst		4—3	30—40	14.7889	2.56828	1.87365	1.2775	2.05968	9.98605	4.22997	1.15819	7.53	_-	_-	_-
Non-karst		4—3	40—50	13.9801	1.63432	0.967441	1.239	2.44091	27.5786	4.12282	2.14689	7.24	_-	_-	_-
Non-karst	WL	5—1	0—10	17.8388	2.3434	2.51432	2.16475	7.64095	26.6299	5.71695	1.89972	7.12	36.7317	1.3163	103
Non-karst		5—1	10—20	23.4936	1.49204	2.5022	1.93375	8.24362	37.1144	3.84421	1.58192	7.53	_-	_-	_-
Non-karst		5—1	20—30	18.8882	1.83396	1.79334	1.72025	6.31763	35.3082	4.47725	1.5113	7.61	_-	_-	_-
Non-karst		5—1	30—40	16.2648	1.30617	1.9751	1.5057	2.52866	13.7329	4.77234	0.451977	7.24	_-	_-	_-
Non-karst		5—1	40—50	19.4711	2.49714	1.85393	1.52075	2.66431	11.5817	5.2636	0.381356	7.01	_-	_-	_-
Non-karst		5—2	0—10	20.8955	2.0359	2.63278	2.247	6.16097	27.3605	6.36152	4.97175	6.1	38.1892	1.2967	129
Non-karst		5—2	10—20	18.0975	1.83855	3.06565	2.15075	11.6549	25.7826	4.9306	1.26412	7.04	_-	_-	_-
Non-karst		5—2	20—30	10.9538	1.99001	2.56163	1.95125	7.36062	25.1104	4.22997	1.33475	7.83	_-	_-	_-
Non-karst		5—2	30—40	14.7638	1.81331	2.23549	1.6247	2.78524	25.222	4.88279	3.91243	4.67	_-	_-	_-
Non-karst		5—2	40—50	15.8353	2.10015	2.62092	1.876	4.53632	11.2849	5.07567	1.68785	7.47	_-	_-	_-
Non-karst		5—3	0—10	19.6827	2.10474	2.76929	1.60125	5.1967	13.6517	5.47956	2.07627	7.19	35.9409	1.3397	144.9
Non-karst		5—3	10—20	14.9963	1.43009	2.51754	1.6415	3.43286	14.2631	4.52835	0.875706	7.43	_-	_-	_-
Non-karst		5—3	20—30	14.9378	1.8615	2.94912	1.49625	5.05163	28.7126	4.04039	1.65254	7.97	_-	_-	_-
Non-karst		5—3	30—40	16.2851	2.10933	2.7633	1.17075	3.85768	9.08042	3.85905	0.59322	7.81	_-	_-	_-
Non-karst		5—3	40—50	13.5904	2.42142	3.07499	1.62575	4.36592	8.61111	4.36185	3.38277	7.41	_-	_-	_-
Karst	MT	1—1	0—10	13.6029	0.959408	3.3566	1.38211	4.62544	8.15195	1.79674	7.25047	7.95	32.5083	1.3615	156.6
Karst		1—1	10—20	11.7739	1.40612	1.92282	1.00333	3.59207	10.9069	2.0605	8.34903	7.84	_-	_-	_-
Karst		1—1	20—30	8.68755	0.76257	1.78667	1.02822	2.40381	7.58625	1.57913	5.61833	8.12	_-	_-	_-
Karst		1—1	30—40	9.43057	1.42754	1.71859	1.18611	2.27346	8.96372	1.72585	11.1896	7.94	_-	_-	_-
Karst		1—1	40—50	13.66	0.930852	2.134	0.963667	2.67884	11.4625	1.43736	18.597	8.01	_-	_-	_-
Karst		1—2	0—10	10.3571	1.67537	1.05253	1.42411	4.33176	31.5309	3.36284	9.69868	7.77	36.217	1.3016	125.8
Karst		1—2	10—20	17.3382	1.74166	2.38525	1.03444	3.99764	29.5802	2.24184	13.2141	7.99	_-	_-	_-
Karst		1—2	20—30	12.3027	2.09964	1.24071	1.04378	5.01728	9.16159	1.57748	16.3371	8.13	_-	_-	_-
Karst		1—2	30—40	13.6188	2.65854	1.47741	1.24367	3.64821	28.2052	2.58144	4.25298	8.13	_-	_-	_-
Karst		1—2	40—50	10.586	2.31892	1.2416	1.911	3.23773	9.54972	3.62826	2.2285	8.12	_-	_-	_-
Karst		1—3	0—10	13.1323	2.11188	1.59666	1.89467	3.61327	8.51471	1.68628	8.83553	7.86	26.2515	1.4403	129.7
Karst		1—3	10—20	13.2496	1.964	2.2367	1.90089	4.38889	4.76788	1.17029	4.22159	7.83	_-	_-	_-
Karst		1—3	20—30	10.1717	2.56675	1.61176	1.58122	2.60895	26.8354	1.43736	4.06466	7.95	_-	_-	_-
Karst		1—3	30—40	3.7521	2.3485	1.62743	1.44511	2.15018	29.0271	2.98038	10.2009	8.15	_-	_-	_-
Karst		1—3	40—50	8.8526	2.45762	1.65232	1.38911	2.94817	13.4919	1.39944	7.94099	8.16	_-	_-	_-
Karst	MS	2—1	0—10	7.77162	0.883937	1.97026	1.48571	3.9309	11.399	6.52967	6.21469	6.18	30.3277	1.4129	58.5
Karst		2—1	10—20	8.12222	1.52749	1.43688	1.778	1.65175	11.0363	7.43142	11.0797	6.84	_-	_-	_-
Karst		2—1	20—30	7.07042	1.34901	1.3634	1.484	1.69219	9.37468	6.45384	7.68989	5.84	_-	_-	_-
Karst		2—1	30—40	8.76498	1.09403	1.60968	1.33156	1.45563	9.43303	6.58572	5.99498	6.1	_-	_-	_-
Karst		2—1	40—50	1.2271	0.94819	1.57022	1.51044	1.38909	9.54718	0	3.02888		_-	_-	_-
Karst		2—2	0—10	16.2506	2.28526	1.0957	1.39844	3.76993	10.605	7.70013	11.5505	6.67	40.495	1.2767	115.1
Karst		2—2	10—20	10.426	0.512698	1.08353	1.61933	5.04338	9.1413	5.9906	5.86943	5.52	_-	_-	_-
Karst		2—2	20—30	14.1537	0.906374	1.35137	1.43656	3.84492	9.00685	7.40834	3.9548	6.34	_-	_-	_-
Karst		2—2	30—40	12.2316	1.24804	1.83104	1.17367	5.19729	4.17935	6.92367	5.30446	6	_-	_-	_-
Karst		2—2	40—50	11.6492	1.18684	1.20284	1.44449	5.00471	10.9044	7.12974	5.32015	6.01	_-	_-	_-
Karst		2—3	0—10	4.09104	1.01652	2.16348	1.66133	7.8349	10.9703	5.28833	6.59134	7.79	42.0053	1.2058	69.7
Karst		2—3	10—20	13.5775	1.32861	1.02595	1.46767	4.48822	8.57813	4.0816	5.32015	8.08	_-	_-	_-
Karst		2—3	20—30	5.39543	1.23376	1.0001	1.51589	2.17295	29.2757	6.35987	6.41871	6.8	_-	_-	_-
Karst		2—3	30—40	3.61672	0.798266	1.23005	1.38989	1.84688	26.7085	6.96818	3.90772	5.96	_-	_-	_-
Karst		2—3	40—50	6.8184	1.05936	1.4396	1.12078	3.50079	9.2859	6.42582	5.39862	6.63	_-	_-	_-
Karst	BM	3—1	0—10	2.33657	1.97216	1.25182	1.40622	6.12073	9.41273	6.34998	4.04896	7.25	32.1092	1.3806	77.2
Karst		3—1	10—20	3.4749	0.966548	1.3253	1.35956	9.29388	11.6679	6.3846	3.84495	7.01	_-	_-	_-
Karst		3—1	20—30	4.0141	1.52443	1.11303	1.46144	9.59815	25.0444	4.81025	4.39422	5.13	_-	_-	_-
Karst		3—1	30—40	3.77446	0.433146	1.33346	1.372	8.85925	9.54972	3.56891	2.21281	8.12	_-	_-	_-
Karst		3—1	40—50	6.77006	1.10015	1.29809	1.442	7.22634	10.6431	0	1.88324	7.82	_-	_-	_-
Karst		3—2	0—10	4.30586	1.13075	1.14709	1.45444	3.46722	4.42288	5.58012	5.88512	7.83	45.7924	1.1515	33.4
Karst		3—2	10—20	5.95742	1.27047	0.982839	1.41136	3.9949	26.0261	6.53627	8.70998	7.27	_-	_-	_-
Karst		3—2	20—30	0.94375	1.9028	1.31404	1.26856	8.99725	28.0911	6.20986	4.37853	6.67	_-	_-	_-
Karst		3—2	30—40	2.06445	0.6769	1.12017	1.40389	2.38398	31.7694	3.36944	6.40301	7.65	_-	_-	_-
Karst		3—2	40—50	2.06445	1.02366	1.35039	1.49411	1.45681	30.9881	1.19172	2.38544	8.19	_-	_-	_-
Karst		3—3	0—10	2.43676	0.595309	1.3365	1.72667	3.55771	29.0398	6.42582	6.02637	7.28	38.1021	1.2498	68.5
Karst		3—3	10—20	4.29333	0.916573	1.221	1.40311	3.83903	27.8551	4.89598	4.34714	6.93	_-	_-	_-
Karst		3—4	20—30	2.2627	1.5387	1.38325	1.62322	6.49058	25.7699	4.51846	2.44821	7.33	_-	_-	_-
Karst		3—5	30—40	1.21838	1.14095	1.43825	1.428	9.117	25.3057	2.97214	1.03578	8.02	_-	_-	_-
Karst		3—6	40—50	2.32072	0.556553	1.86175	1.281	9.26482	26.0616	2.90125	12.5706	7.95	_-	_-	_-
Karst	SS	4—1	0—10	18.8103	3.19245	1.53376	2.3485	13.012	27.1677	4.60089	2.74718	7.25	40.9774	1.3117	125.5
Karst		4—1	10—20	11.9811	1.95099	1.71265	1.94775	7.56223	8.89016	4.77728	1.40537	7.76	_-	_-	_-
Karst		4—1	20—30	14.2575	2.41224	1.14372	1.62575	6.26541	30.0723	4.54319	1.58192	8.03	_-	_-	_-
Karst		4—1	30—40	15.3358	1.45533	2.84464	1.071	3.81979	26.843	5.09875	1.33475	7.9	_-	_-	_-
Karst		4—1	40—50	9.22542	2.93544	2.46926	1.17775	2.6117	31.0337	2.38691	1.89972	7.75	_-	_-	_-
Karst		4—2	0—10	19.3727	1.47828	1.33141	1.99325	9.20711	8.96372	5.91642	6.41949	7.87	31.3096	1.4264	119.5
Karst		4—2	10—20	11.0701	2.18735	1.70678	1.34575	6.84433	26.7136	4.10963	2.14689	7.98	_-	_-	_-
Karst		4—2	20—30	10.4685	1.1616	2.65109	1.267	4.82921	26.4219	3.2425	1.47599	8.07	_-	_-	_-
Karst		4—2	30—40	8.78387	1.73988	2.48099	1.26	4.16608	8.22806	3.01006	1.1935	8.02	_-	_-	_-
Karst		4—2	40—50	11.3107	1.43009	1.60707	1.351	2.30585	17.2742	3.09248	0.734463	8.05	_-	_-	_-
Karst		4—3	0—10	20.6005	2.46272	1.12052	1.44375	13.2161	28.4538	5.75157	2.95904	7.64	19.7211	1.7428	105
Karst		4—3	10—20	16.6876	2.67613	1.35319	1.561	7.10522	26.4726	4.6454	2.25282	7.74	_-	_-	_-
Karst		4—3	20—30	14.7311	2.11163	1.33482	1.477	3.90047	29.0449	4.59265	2.42938	7.85	_-	_-	_-
Karst		4—3	30—40	8.05606	1.4255	1.14501	1.148	2.51865	26.29	3.95961	1.15819	7.73	_-	_-	_-
Karst		4—3	40—50	8.17115	2.53386	1.67771	1.4175	2.30055	4.93785	0	2.14689	7.52	_-	_-	_-
Karst	WL	5—1	0—10	29.501	1.46221	2.62066	1.25335	5.3508	9.94546	1.68628	1.89972	7.91	29.7643	1.4299	192.3
Karst		5—1	10—20	13.2524	0.799031	2.08184	0.8505	3.53907	29.6994	1.42087	1.58192	8.29	_-	_-	_-
Karst		5—1	20—30	11.0629	1.67333	2.14919	1.11825	2.20966	8.53754	1.15875	1.5113	8	_-	_-	_-
Karst		5—1	30—40	11.2933	1.72152	1.62261	1.3055	3.77621	26.6629	1.79509	0.451977	8.07	_-	_-	_-
Karst		5—1	40—50	10.8324	2.63712	1.64404	0.87395	2.06027	9.90487	0.827399	0.381356	8.05	_-	_-	_-
Karst		5—2	0—10	29.8261	1.33141	1.58361	1.68175	7.28112	27.2996	3.03643	4.97175	7.47	21.3647	1.6986	263
Karst		5—2	10—20	26.5257	1.01933	1.60682	1.64535	7.95681	30.2017	2.89796	1.26412	7.63	_-	_-	_-
Karst		5—2	20—30	14.9131	1.76053	2.46533	1.78675	6.20024	28.1393	2.99192	1.33475	7.99	_-	_-	_-
Karst		5—2	30—40	30.5595	0.971137	1.75184	1.7815	4.08009	30.3843	3.28701	3.91243	7.73	_-	_-	_-
Karst		5—2	40—50	24.4476	1.36583	3.19043	1.9495	6.09423	31.2468	3.16502	1.68785	7.66	_-	_-	_-
Karst		5—3	0—10	21.7303	1.57925	1.67681	2.0664	9.54142	25.5112	3.12216	2.07627	7.33	36.7253	1.3021	186.8
Karst		5—3	10—20	21.959	2.0818	2.99475	1.099	5.97291	10.4782	2.04731	0.875706	7.76	_-	_-	_-
Karst		5—3	20—30	16.1262	1.14554	1.57781	1.07975	3.36317	4.22248	1.84949	1.65254	7.88	_-	_-	_-
Karst		5—3	30—40	14.8681	1.40255	1.59328	1.2075	3.19081	25.1306	1.93027	0.59322	7.86	_-	_-	_-
Karst		5—3	40—50	32.5954	1.71005	1.71394	2.10385	2.78053	27.2286	3.50913	3.38277	7.74	_-	_-	_-
VR	MT	1—1	0—10	6.39558	2.12106	1.64175	1.39144	1.66254	4.76535	3.12545	6.21155	8.33	27.2303	1.4583	144.5
VR		1—1	10—20	5.26362	1.12973	1.25675	1.27167	1.12603	4.04744	3.30349	0.546139	8.45	_-	_-	_-
VR		1—1	20—30	6.16918	1.26334	1.8425	1.21567	1.36042	4.88204	2.76607	0.797238	8.12	_-	_-	_-
VR		1—1	30—40	4.01846	0.714635	1.43825	1.33622	0.724774	5.09767	2.32097	1.45637	8.18	_-	_-	_-
VR		1—1	40—50	2.99969	1.09301	2.552	1.41867	1.46113	3.90284	3.20458	0.451977	8.31	_-	_-	_-
VR		1—2	0—10	10.6155	1.77226	1.47125	1.45164	1.26953	5.15094	4.21513	0.106717	7.88	11.5091	1.862	68.4
VR		1—2	10—20	5.67674	1.43978	1.46025	1.50189	0.378877	4.82877	6.0483	1.00126	8.5	_-	_-	_-
VR		1—2	20—30	3.00867	1.81611	2.30725	1.484	0.553592	7.92872	3.70903	0.451977	8.34	_-	_-	_-
VR		1—2	30—40	6.24441	1.7386	1.96625	1.45833	0.792697	3.46651	3.48648	0.232266	8.22	_-	_-	_-
VR		1—2	40—50	8.0042	0.953289	2.783	1.50189	0.496663	3.06824	3.4667	1.72316	8.22	_-	_-	_-
VR		1—3	0—10	9.30233	0.909434	1.76095	1.47467	1.23106	3.27879	4.61738	0.938481	8.33	27.3296	1.4391	84.7
VR		1—3	10—20	5.46512	1.58664	1.7343	1.53067	1.05124	7.38077	3.69749	0.765851	8.4	_-	_-	_-
VR		1—3	20—30	1.80233	1.13687	1.55581	1.27167	0.724578	3.30923	2.26327	0.624608	8.13	_-	_-	_-
VR		1—3	30—40	2.26901	1.10525	1.11358	1.19467	0.607578	5.69381	3.65298	0.671689	8.32	_-	_-	_-
VR		1—3	40—50	6.10466	1.47751	1.6011	1.12233	0.511975	3.20523	3.55407	0.326428	8.15	_-	_-	_-
VR	MS	2—1	0—10	4.01708	1.94156	1.82835	1.11067	0.808991	8.41071	2.65068	0.703076	7.83	29.6962	1.185	23.4
VR		2—1	10—20	7.11598	1.30311	1.87413	1.09511	1.10738	4.4381	1.80333	0.326428	8.17	_-	_-	_-
VR		2—1	20—30	6.71427	1.31739	1.83239	1.08111	1.09757	10.4579	1.84784	0.24796	8.13	_-	_-	_-
VR		2—1	30—40	10.1001	1.13279	1.97779	1.06789	1.4309	4.1692	2.17755	0.326428	8	_-	_-	_-
VR		2—1	40—50	4.87789	0.438246	2.13532	1.085	0.573616	7.94901	1.7819	0.467671	8.04	_-	_-	_-
VR		2—2	0—10	6.80569	2.23019	1.57523	1.57889	1.01217	3.7278	5.33614	1.8801	8.11	32.405	1.1742	34.3
VR		2—2	10—20	4.68694	1.63763	1.53754	1.50733	0.543581	5.16616	3.5277	1.629	8.5	_-	_-	_-
VR		2—2	20—30	9.05285	2.21387	1.65063	1.57344	0.956027	4.85921	4.55803	0.59322	8.18	_-	_-	_-
VR		2—2	30—40	6.29205	0.740133	1.48907	1.48867	0.438948	4.42035	4.44098	0.875706	8.34	_-	_-	_-
VR		2—2	40—50	7.70455	1.54584	1.87682	1.48789	0.899097	5.22197	2.93917	0.922787	8.37	_-	_-	_-
VR		2—3	0—10	6.68275	1.0614	1.77364	1.93044	3.76148	4.94292	3.13699	0.875706	8.22	25.0747	1.3053	52.2
VR		2—3	10—20	6.74036	1.05732	1.79208	1.57656	0.966431	5.58727	2.70343	1.45637	8.11	_-	_-	_-
VR		2—3	20—30	7.08602	1.14911	1.77627	1.25767	1.92619	7.1347	2.62595	0.263653	8.56	_-	_-	_-
VR		2—3	30—40	3.34137	0.85436	1.24128	1.45444	1.32666	5.01649	3.26063	0.357815	8.45	_-	_-	_-
VR		2—3	40—50	2.82288	1.62947	1.82634	1.50422	0.535925	8.01243	3.57221	0.232266	8.32	_-	_-	_-
VR	BM	3—1	0—10	6.87246	0.960428	1.25646	0.957444	1.96427	5.89675	2.98863	1.20527	8.18	27.6975	1.1835	51
VR		3—1	10—20	5.37092	0.49434	1.27471	0.997111	1.42285	6.46753	2.59792	1.03264	8.11	_-	_-	_-
VR		3—1	20—30	1.27054	0.794187	1.53799	0.935667	1.08206	5.74962	2.95895	5.08161	8.39	_-	_-	_-
VR		3—1	30—40	5.31316	1.11749	1.43372	0.973778	1.56144	4.4584	5.17953	1.29944	8.13	_-	_-	_-
VR		3—1	40—50	7.96974	1.6152	1.59795	1.04689	0.536121	4.55733	3.11227	5.33271	8.17	_-	_-	_-
VR		3—2	0—10	10.2213	1.63661	1.29207	1.11533	2.84531	8.74302	3.53429	0.844319	7.95	24.0749	1.5593	61.7
VR		3—2	10—20	7.89829	1.81611	2.02735	0.997111	1.94837	8.63648	2.94082	0.342122	7.75	_-	_-	_-
VR		3—2	20—30	10.744	1.06548	1.19084	1.02122	1.09678	12.3351	2.10831	0.844319	7.76	_-	_-	_-
VR		3—2	30—40	7.31753	1.54278	1.89681	1.04829	0.697291	10.1256	2.46109	5.8349	7.59	_-	_-	_-
VR		3—2	40—50	4.0653	1.34839	1.17485	1.00567	1.25245	8.55277	2.56166	7.73384	7.69	_-	_-	_-
VR		3—3	0—10	4.63749	0.878837	1.20095	1.00333	2.08068	10.8283	1.91378	8.51852	7.02	24.4843	1.4834	156.8
VR		3—3	10—20	7.50014	0.601428	1.34366	0.981556	0.44896	13.2331	2.18909	0.24796	7.26	_-	_-	_-
VR		3—4	20—30	9.504	0.637124	1.24942	0.882	1.08912	14.1743	2.15447	5.97615	7.57	_-	_-	_-
VR		3—5	30—40	9.504	0.447425	1.46483	1.04533	0.684923	11.1986	2.41823	1.42498	7.41	_-	_-	_-
VR		3—6	40—50	7.90091	0.508618	1.23326	1.07878	0.40636	13.0403	4.41625	2.28814	7.6	_-	_-	_-
