# Supplementary material for: Effects of vegetation restoration on distribution characteristics of heavy metals in soil in Karst plateau area of Guizhou
Source: PeerJ. 2023 Mar 17;11:e15044. doi: 10.7717/peerj.15044 (PMC10026723; doi:10.7717/peerj.15044)
Supplement: Supplemental Information 2 [file peerj-11-15044-s002.xlsx]

## Sheet: Sheet2
KO	NK1	NK2	NK3	NK4	NK5	NK6	NK7	NK8	NK9	NK10	NK11	NK12	NK13	NK14	NK15	K1	K2	K3	K4	K5	K6	K7	K8	K9	K10	K11	K12	K13	K14	K15	VR1	VR2	VR3	VR4	VR5	VR6	VR7	VR8	VR9
K00001	1.2991	1.3645	1.5541	1.3784	1.4285	1.377	1.3022	1.2272	1.5466	1.54	1.5	1.4897	1.3163	1.2967	1.3397	1.3615	1.3016	1.4403	1.4129	1.2767	1.2058	1.3806	1.1515	1.2498	1.3117	1.4264	1.7428	1.4299	1.6986	1.3021	1.4583	1.862	1.4391	1.185	1.1742	1.3053	1.1835	1.5593	1.4834
K00002	25.7178	32.8985	16.8329	30.7023	29.5485	22.4401	35.6243	31.7063	25.2683	26.7208	24.6467	28.489	36.7317	38.1892	35.9409	32.5083	36.217	26.2515	30.3277	40.495	42.0053	32.1092	45.7924	38.1021	40.9774	31.3096	19.7211	29.7643	21.3647	36.7253	27.2303	11.5091	27.3296	29.6962	32.405	25.0747	27.6975	24.0749	24.4843
K00003	4.36	4.41	4.4	4.35	4.13	4.44	4.4	4.62	3.89	7.25	6.63	6.73	7.12	6.1	7.19	8.33	7.88	8.33	7.83	8.11	8.22	8.18	7.95	7.02	7.25	7.87	7.64	7.91	7.47	7.33	7.95	7.77	7.86	6.18	6.67	7.79	7.25	7.83	7.28
K00004	30.6	59.5	38.2	17.6	45.3	53.7	21.8	49.8	36.5	66.6	63.5	97.6	103	129	144.9	156.6	125.8	129.7	58.5	115.1	69.7	77.2	33.4	68.5	125.5	119.5	105	192.3	263	186.8	144.5	68.4	84.7	23.4	34.3	52.2	51	61.7	156.8
K00005	14.5338	15.6552	19.5896	13.4754	19.4058	21.3384	17.1353	7.08368	9.25007	20.4317	16.7833	18.4861	17.8388	20.8955	19.6827	13.6029	10.3571	13.1323	7.77162	16.2506	4.09104	2.33657	4.30586	2.43676	19.6489	19.132	20.6581	26.6776	30.804	22.0734	6.39558	10.6155	9.30233	4.01708	6.80569	6.68275	6.87246	10.2213	4.63749
K00006	18.4365	22.7812	26.0347	22.5875	20.4865	24.0765	30.9709	24.2805	16.4783	20.8868	21.69	27.8628	23.434	20.359	21.0474	20.7619	17.5798	11.0933	19.7726	21.0168	10.2162	10.4304	17.2228	8.00306	31.9245	14.7828	24.6272	14.6221	13.3141	15.7925	9.4921	16.5293	21.5268	8.13565	26.4018	11.0933	18.8853	11.1443	6.86079
K00007	2.3322	1.68025	3.41086	1.90767	2.53358	1.9745	2.49883	1.95895	2.31842	2.50014	1.81758	1.76344	2.51432	2.63278	2.76929	1.65825	1.43275	1.65971	1.83912	1.57523	1.79208	1.29296	1.32937	1.16594	1.53376	1.33141	1.12052	2.62066	1.58361	1.67681	3.25379	1.10811	1.59944	2.07095	1.15414	2.18797	1.30353	1.08247	1.6665
K00008	1.99033	2.14122	1.2838	1.80616	1.13431	1.69633	1.69089	1.32689	1.68856	1.946	2.1875	1.87425	2.16475	2.247	1.60125	0.836111	0.882778	1.25067	0.944378	0.829111	0.975333	0.832222	0.861778	1.036	2.3485	1.99325	1.44375	1.25335	1.68175	2.0664	1.39144	1.45164	1.47467	1.11067	1.57889	1.93044	0.957444	1.11533	1.00333
K00009	13.6334	15.6121	15.1834	8.08295	15.2113	11.5406	6.69026	16.1829	10.0464	9.70776	7.9726	11.9053	10.484	10.4612	6.59132	3.23262	3.08549	2.11136	4.09259	2.46905	3.01446	3.77042	4.44013	5.99264	9.11986	3.85731	9.54224	5.3984	8.90868	7.96689	3.84906	12.5553	3.90741	5.20878	5.32801	5.08447	4.59234	2.67707	10.673
K00010	4.0212	4.61641	4.08402	3.95917	1.29662	8.62132	6.80291	7.65803	5.00903	4.17712	6.45848	5.24558	3.91343	3.45451	3.41299	1.15842	0.909109	1.17805	0.776011	0.867295	2.36808	1.12328	1.82175	1.37515	7.58966	5.77783	7.97968	2.66431	5.08657	5.46776	2.69258	2.57911	2.55791	2.74009	2.08088	4.69003	3.54358	2.31056	2.24441
K00011	2.35876	4.86582	5.18362	4.83051	5.53672	6.41949	4.54802	7.58475	6.24294	2.92373	6.80791	2.64124	1.72316	1.72316	1.86441	1.01695	4.05367	0.720339	0.367232	2.83898	1.00282	1.77966	0.29661	5.66384	2.92373	6.80791	2.64124	1.72316	1.72316	1.86441	2.35876	4.86582	5.18362	4.83051	5.53672	6.41949	4.54802	7.58475	6.24294
K00012	2.56454	2.76484	2.65727	3.24703	3.39911	4.28561	3.28042	4.08902	3.14318	6.30712	6.5	5.27596	5.66172	6.09941	5.43175	3.93694	4.55638	4.12611	2.72033	3.82196	3.57715	2.9911	3.5957	1.85979	4.38576	6.08457	6.38131	1.7003	3.06528	3.17656	1.78561	3.41766	1.9451	7.10831	8.1543	4.6862	6.47033	5.47255	6.3776
